# Supplementary material for: Dual-activator luminescence of RE/TM:Y3Al5O12(RE = Eu3+, Tb3+, Dy3+; TM = Mn4+, Cr3+) phosphors for self-referencing optical thermometry
Source: Royal Society of Chemistry journal article supplement (doi:10.1039/c6tc02934e), 2016-01-01
Supplement: c6tc02934e1.pdf [file c6tc02934e1.pdf]

## Electronic Supplementary Information

### **Dual-Activator Luminescence of RE/TM: Y<sub>3</sub>Al<sub>5</sub>O<sub>12</sub> (RE=Eu<sup>3+</sup>, Tb<sup>3+</sup>, Dy<sup>3+</sup>; TM=Mn<sup>4+</sup>, Cr<sup>3+</sup>) phosphors for Self- Referencing Optical Thermometry**

Daqin Chen <sup>a,b,\*</sup>, Shen Liu <sup>a</sup>, Yang Zhou <sup>a</sup>, Zhongyi Wan <sup>a</sup>, Ping Huang <sup>b</sup> and Zhenguo Ji <sup>a</sup>

<sup>a</sup> College of Materials & Environmental Engineering, Hangzhou Dianzi University,  
Hangzhou 310018, P. R. China

<sup>b</sup> State Key Laboratory of Structural Chemistry, Fujian Institute of Research on the  
Structure of Matter, Chinese Academy of Sciences,  
Fuzhou, Fujian 350002, P. R. China

\*Corresponding author: [dqchen@hdu.edu.cn](mailto:dqchen@hdu.edu.cn) (D. Q. Chen)

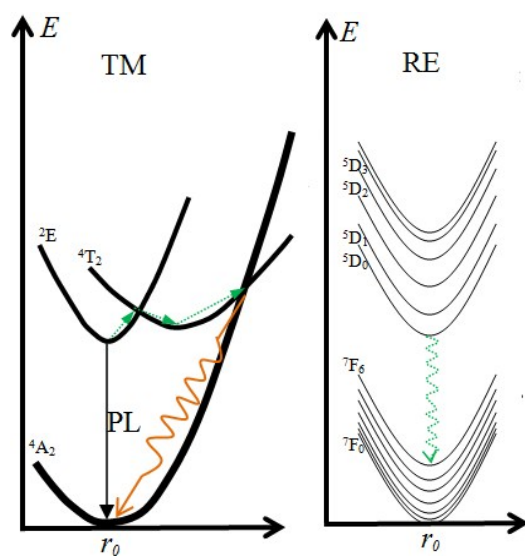

Figure S1 Configurational coordinate diagrams of TM (left) and RE (right) emitting centers in YAG host, showing the energy-level crossing relaxation (ELCR) quenching mechanism for TM activator and multi-phonon deexcitation (MPD) quenching for RE one.

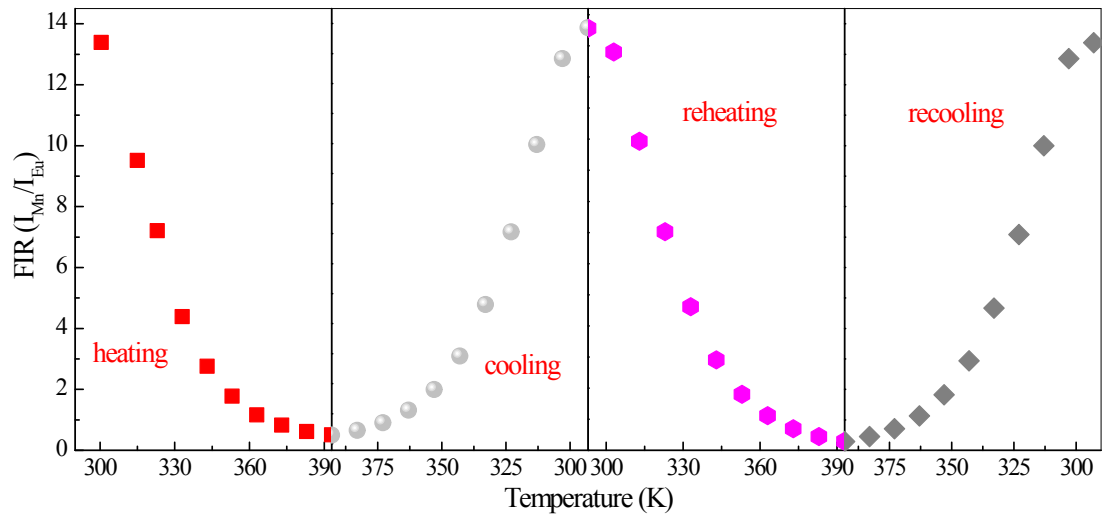

Figure S2 Plots of  $Mn^{4+}/Eu^{3+}$  FIR versus temperature measured on the cycling (heating/cooling and reheating/recooling) process.

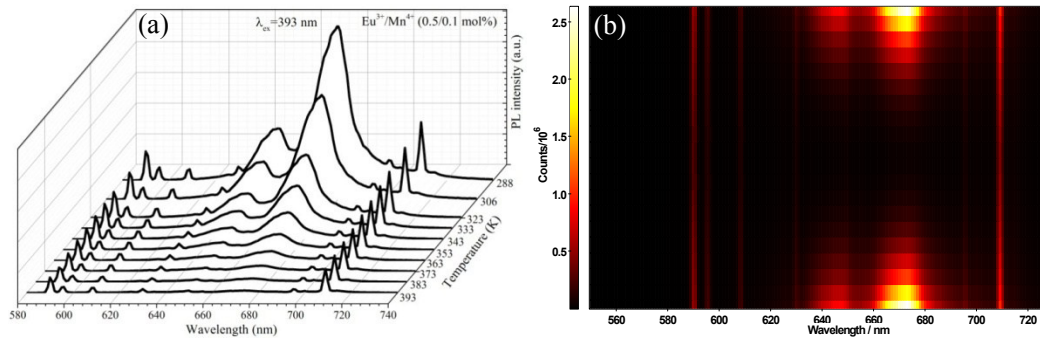

Figure S3 (a) Temperature-dependent PL spectra of  $\text{Eu}^{3+}/\text{Mn}^{4+}$  (0.5/0.1 mol%): YAG sample recorded from 288 K to 393 K. (b) Temperature-dependent emission mapping upon the cycling processes of heating and cooling over the temperature range from 288 K to 393 K.

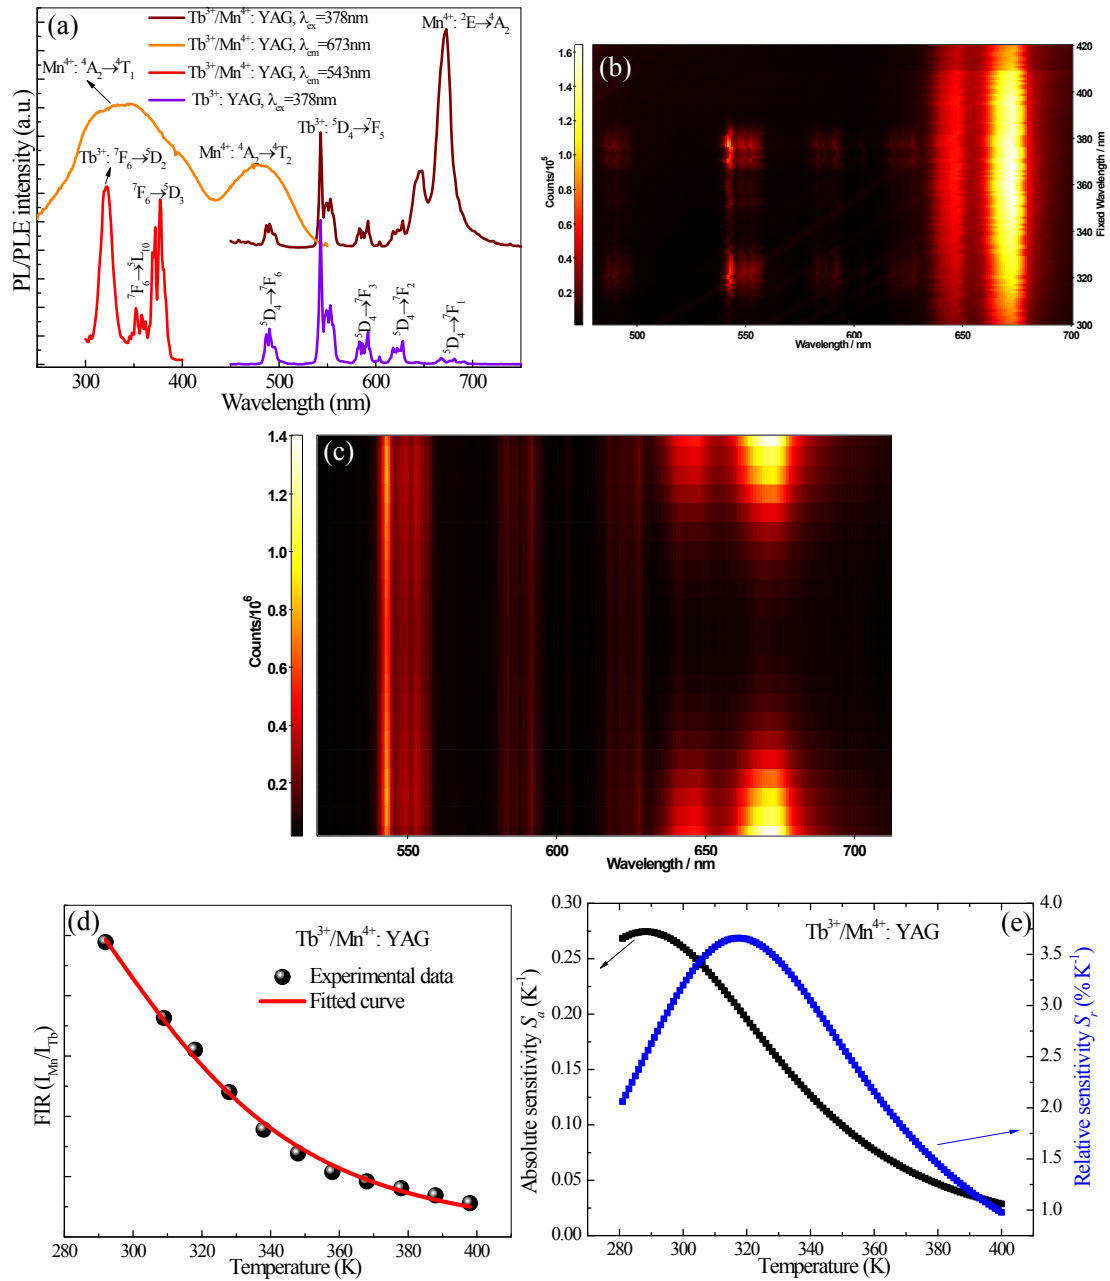

Figure S4 (a) PL and PLE spectra of Tb<sup>3+</sup>: YAG and Tb<sup>3+</sup>/Mn<sup>4+</sup>: YAG products. (b) Excitation-wavelength-dependent emission mapping of Tb<sup>3+</sup>/Mn<sup>4+</sup>: YAG sample. (c) Temperature-dependent PL spectra of Tb<sup>3+</sup>/Mn<sup>4+</sup>: YAG sample recorded from 303 K to 393 K. Dependence of (d) experimental FIR and (e) the corresponding absolute sensitivity ( $S_a$ ) and relative sensitivity ( $S_r$ ) on temperature for the Tb<sup>3+</sup>/Mn<sup>4+</sup>: YAG sample.

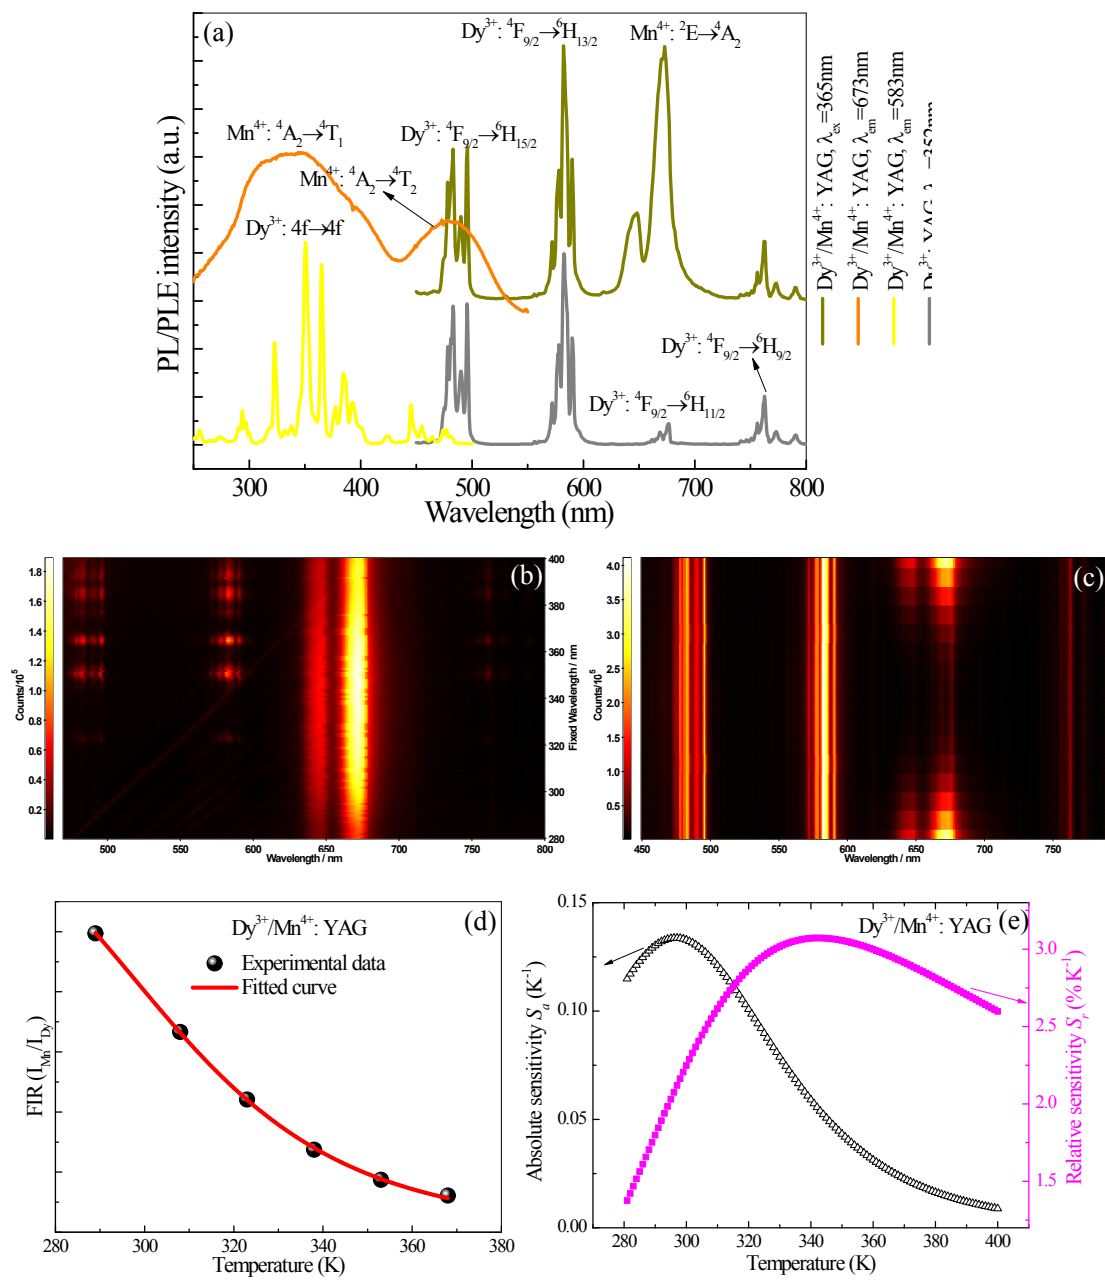

Figure S5 (a) PL and PLE spectra of Dy<sup>3+</sup>: YAG and Dy<sup>3+</sup>/Mn<sup>4+</sup>: YAG products. (b) Excitation-wavelength-dependent emission mapping of Dy<sup>3+</sup>/Mn<sup>4+</sup>: YAG sample. (c) Temperature-dependent PL spectra of Dy<sup>3+</sup>/Mn<sup>4+</sup>: YAG sample recorded from 303 K to 393 K. Dependence of (d) experimental FIR and (e) the corresponding absolute sensitivity ( $S_a$ ) and relative sensitivity ( $S_r$ ) on temperature for the Dy<sup>3+</sup>/Mn<sup>4+</sup>: YAG sample.

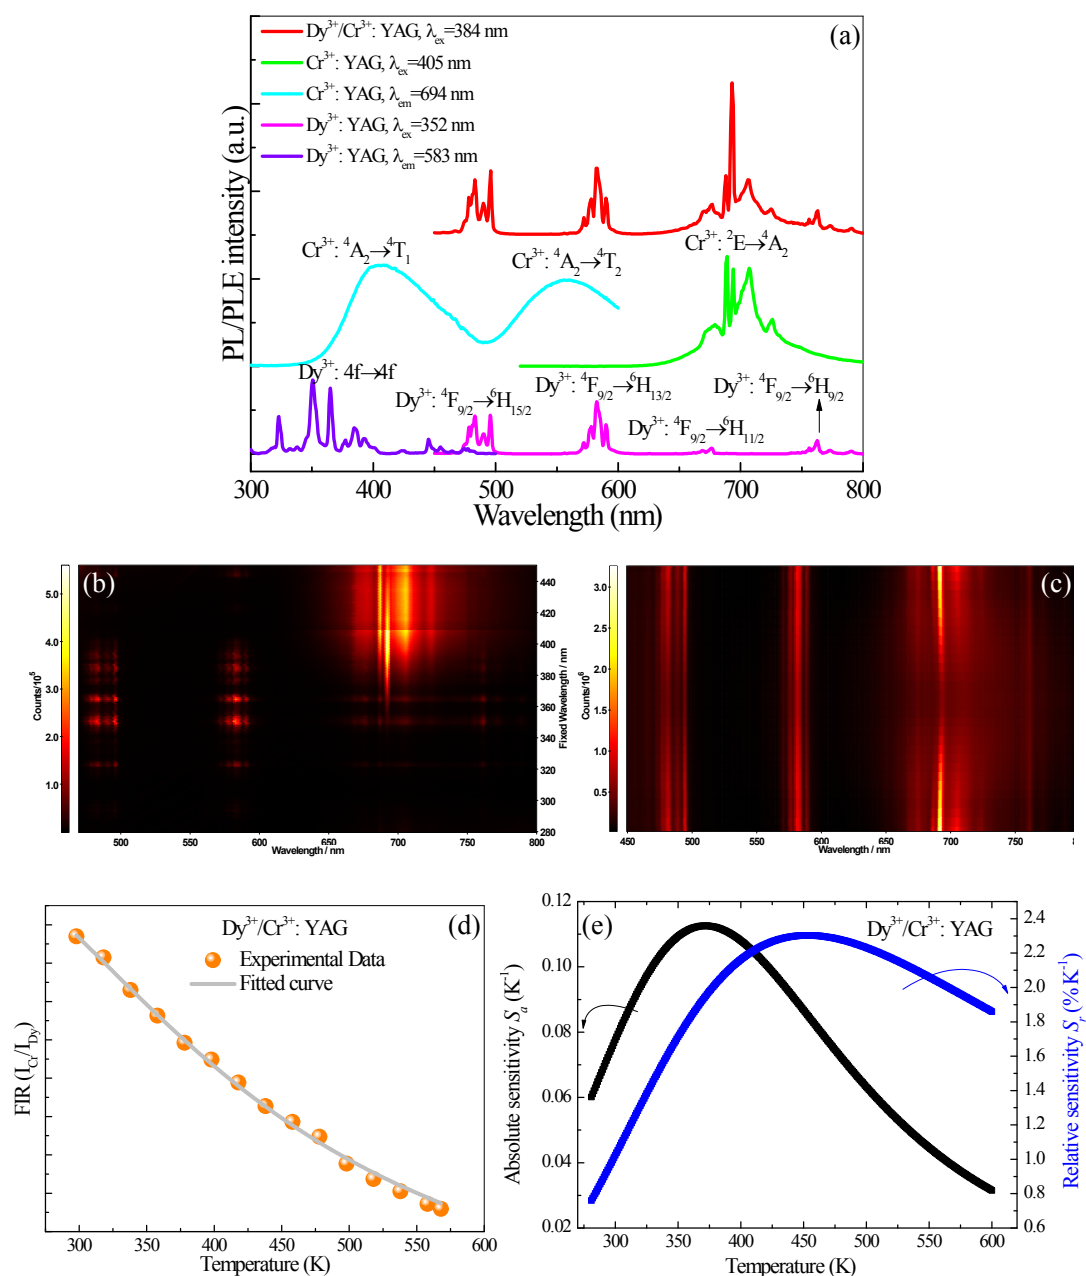

Figure S6 (a) PL and PLE spectra of Dy<sup>3+</sup>: YAG and Dy<sup>3+</sup>/Cr<sup>3+</sup>: YAG products. (b) Excitation-wavelength-dependent emission mapping of Dy<sup>3+</sup>/Cr<sup>3+</sup>: YAG sample. (c) Temperature-dependent PL spectra of Dy<sup>3+</sup>/Cr<sup>3+</sup>: YAG sample recorded from 303 K to 393 K. Dependence of (d) experimental FIR and (e) the corresponding absolute sensitivity ( $S_a$ ) and relative sensitivity ( $S_r$ ) on temperature for the Dy<sup>3+</sup>/Cr<sup>3+</sup>: YAG sample.

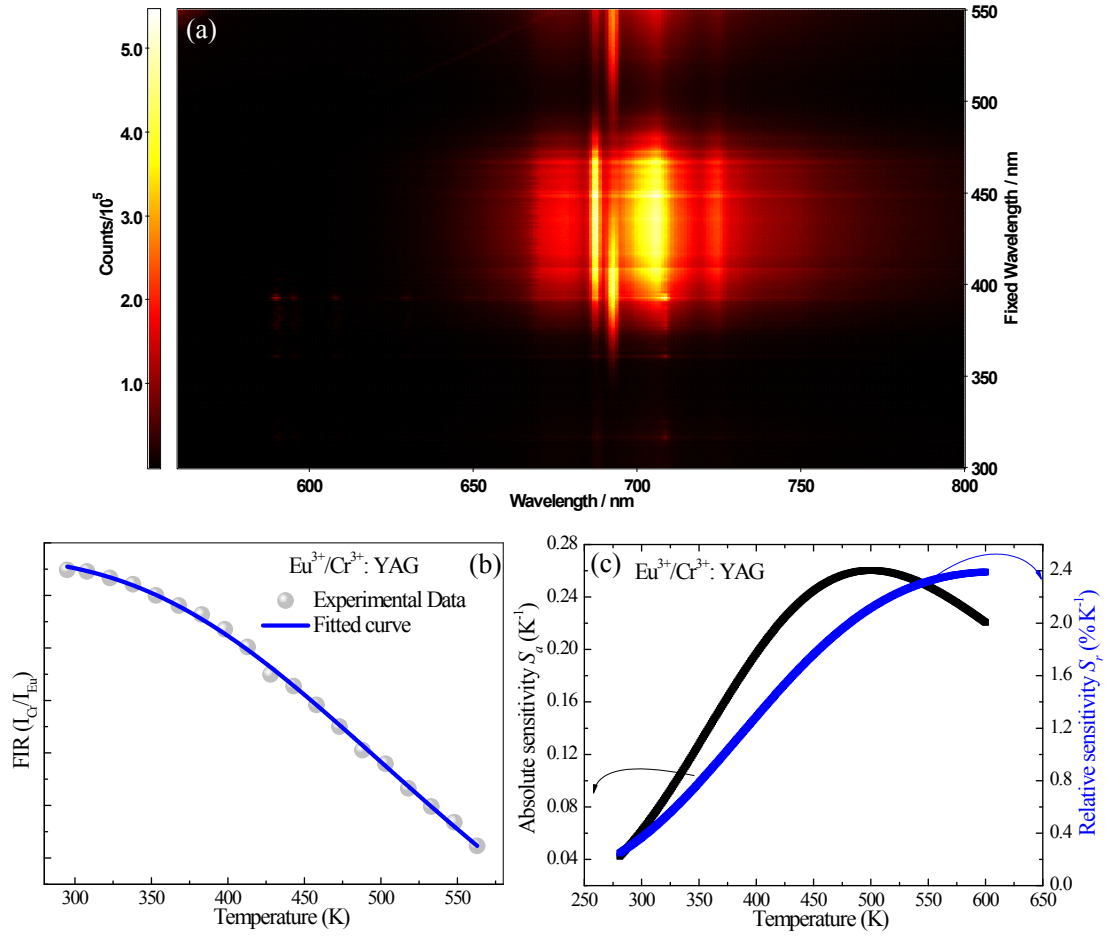

Figure S7 (a) Excitation-wavelength-dependent emission mapping of Eu<sup>3+</sup>/Cr<sup>3+</sup>: YAG sample. Dependence of (b) experimental FIR and (c) the corresponding absolute sensitivity ( $S_a$ ) and relative sensitivity ( $S_r$ ) on temperature for the Eu<sup>3+</sup>/Cr<sup>3+</sup>: YAG sample.
